# Supplementary material for: Racial Inequalities in Eligibility and Access to Lung Cancer Screening: Systematic Review of United States Studies
Source: Research Square preprint supplement (doi:10.21203/rs.3.rs-5641366/v1), 2025-06-24
Supplement: Supplementary file 1 [file 33f3eb438c3579ca2bd876c5.docx]

Table 1. Racial Inequalities in Eligibility (*n*=12) and change in estimated racial inequalities between 2013 and 2021 guidelines

| **Study** | **Study Population** | **Racial group** | **Eligibility for Lung Cancer Screening** | | **Absolute Inequality** | | **Change in Inequality between Guidelines** |
| --- | --- | --- | --- | --- | --- | --- | --- |
| **2013** | **2021** | **2013** | **2021** |
| Reese et al. (2021) | Behavioral Risk Factor Surveillance System | White | 31.1% | 40.9% | Reference | Reference | Reference |
| Black | 16.3% | 28.8% | 14.8% | 12.1% | -2.70% |
| Hispanic | 10.5% | 18.7% | 20.6% | 22.2% | 1.60% |
| Narayan et al. (2021) | Behavioral Risk Factor Surveillance System | White | 12.0% | 15.0% | Reference | Reference | Reference |
| Black | 7.0% | 9.0% | 5.0% | 6.0% | 1.00% |
| Hispanic | 4.0% | 5.0% | 8.0% | 10.0% | 2.00% |
| Asian American | 4.0% | 5.0% | 8.0% | 10.0% | 2.00% |
| American Indian | 17.0% | 21.0% | - 5.0% | -6.0% | 1.00% |
| Aredo et al. (2022) | Multiethnic Cohort | White | 43.5% | 49.6% | Reference | Reference | Reference |
| Black | 27.7% | 38.4% | 15.8% | 11.2% | -4.60% |
| Hispanic | 28.9% | 37.3% | 14.6% | 12.3% | -2.30% |
| Asian | 33.4% | 40.0% | 10.1% | 9.6% | -0.50% |
| Native Hawaiian | 46.3% | 56.7% | -2.8% | -7.1% | 4.30% |
| Pinheiro et al. (2022) | REGARDS study | White | 27.2% | 34.6% | Reference | Reference | Reference |
| Black | 19.2% | 28.8% | 8.0% | 5.8% | -2.20% |
| Williams et al. (2022) | Behavioral Risk Factor Surveillance System | White | 21.9% | 35.8% | Reference | Reference | Reference |
| Black | 16.0% | 28.5% | 5.9% | 7.3% | 1.40% |
| Hispanic | 9.8% | 18.0% | 12.1% | 17.8% | 5.70% |
| Liu et al. (2023) | Boston Medical Center’s Clinical Data Warehouse | White | 60.6% | 72.8% | Reference | Reference | Reference |
| Black | 44.3% | 64.7% | 16.3% | 8.1% | -8.20% |
| Hispanic | 59.3% | 70.4% | 1.3% | 2.4% | 1.10% |
| Li et al. (2024) | Health and Retirement Study | White | 35.1% | 63.4% | Reference | Reference | Reference |
| Black | 13.3% | 36.5% | 21.8% | 26.9% | 5.10% |
| Hispanic | 12.0% | 30.3% | 23.1% | 33.1% | 10.00% |
| Potter et al. (2024) | Southern Community Cohort Study | White | 59.1% | 74.4% | Reference | Reference | Reference |
| Black | 33.5% | 57.4% | 25.6% | 17.0% | -8.60% |
| Aldrich et al. (2019) | Southern Community Cohort Study | White | 31.0% | - | Reference | - | - |
| Black | 17.0% | - | 14.0% | - | - |
| Potter et al. (2024) | Southern Community Cohort Study and Black Women’s Health Study | White | 74.0% | - | Reference | - | - |
| Black | 57.6% | - | 16.4% | - | - |
| Ryan et al. (2016) | National Cancer Institute-Maryland Lung Cancer Study | European American | 39.4% | - | Reference | - | - |
| Black American | 34.0% | - | 5.4% | - | - |
| Tailor et al. (2020) | American Community Survey, Behavioral Risk Factor Surveillance System, Tobacco Use Supplement to the Current Population Survey | White | 5.4% | - | Reference | - | - |
| Black | 2.0% | - | 3.4% | - | - |
| Hispanic | 0.7% | - | 4.7% | - | - |

Table 2. Access to lung cancer screening (*n*=17)

| **Study** | **Population Studied** | **Racial group** | **Access to Lung Cancer Screening** | **Absolute Inequality** |
| --- | --- | --- | --- | --- |
| Navuluri et al. (2023) | Durham Veterans Affairs Health Care System Lung Cancer Screening Database | White | 40.3% | Reference |
| Black | 30.5% | 9.9% |
| Hughes et al. (2023) | County Health Rankings | White | 3.71% | Reference |
| Black | 2.2% | 1.5% |
| Lake et al. (2020) | Jane and Leonard Korman Respiratory Institute Lung Cancer Screening Program | White | 76.7% | Reference |
| Black | 63.8% | 12.9% |
| Oshiro et al. (2022) | Kaiser Permanente Hawaii EMR Data | Korean | 94.0% | Reference |
| Filipino | 79.0% | 15.0% |
| Japanese | 88.0% | 6.0% |
| Chinese | 82.0% | 12.0% |
| White | 80.0% | 14.0% |
| Native Hawaiian | 80.0% | 14.0% |
| Pacific Islander | 79.0% | 15.0% |
| Hispanics | 79.0% | 15.0% |
| Richmond et al. (2020) | Community-based Cancer Center | White | 8.0% | Reference |
| Black | 1.7% | 6.3% |
| Steiling et al. (2020) | Boston Medical Center Lung Cancer Screening Program | White | 64.8% | Reference |
| Black | 55.4% | 9.4% |
| Asian | 90.9% | -26.1% |
| Wong et al. (2024) | A tertiary care, academic center in Northern California | White | 87.5% | Reference |
| Black | 90.0% | -2.5% |
| Asian | 84.4% | 3.1% |
| Gudina et al. (2023) | Behavioral Risk Factor Surveillance System | White | 16.03% | Reference |
| Black | 14.61% | 1.42% |
| Hispanic | 16.67% | -0.6% |
| Japuntich et al. (2018) | Lifespan Medical System | Non-Black | 13.0% | Reference |
| Black | 3.0% | 10.0% |
| Poghosyan et al. (2021) | Behavioral Risk Factor Surveillance System | White | 17.4% | Reference |
| Black | 12.0% | 5.4% |
| Poulson et al. (2022) | Boston Medical Center Lung Cancer Screening Program | White | 65.0% | Reference |
| Black | 55.1% | 9.9% |
| Shin et al. (2022) | A tertiary care, academic center in New England | White | - | Relative |
| Black | - | - |
| Asian | - | - |
| Shusted et al. (2023) | Jefferson Lung Cancer Screening Program | White | 85.8% | Reference |
| Black | 73.3% | 12.5% |
| Lozier et al. (2021) | Behavioral Risk Factor Surveillance System | White | 15.4% | Reference |
| Black | 13.2% | 2.2% |
| Narayan et al. (2021) | Behavioral Risk Factor Surveillance System | White | - | Relative |
| Black | - | - |
| Hispanic | - | - |
| Asian | - | - |
| American Indian | - | - |
| Williams et al. (2022) | Behavioral Risk Factor Surveillance System | White | 20.8% | Reference |
| Black | 20.2% | 3.6% |
| Hispanic | 23.8% | -3.0% |
| Tailor et al. (2020) | Behavioral Risk Factor Surveillance System | White | 5.4% | Reference |
| Black | 2.0% | 3.4% |
| Hispanic | 0.7% | 4.7% |
